# Supplementary material
Source: PubMed Central journal article supplement (PMC6990808)
Supplement: jamaneurol-e194476-s001.pdf [file jamaneurol-e194476-s001.pdf]

## Supplementary Online Content

Hartings JA, Andaluz N, Bullock MR, et al. Prognostic value of spreading depolarizations in patients with severe traumatic brain injury. *JAMA Neurol*. Published online December 30, 2019. doi:10.1001/jamaneurol.2019.4476

**eFigure 1.** Definition of spreading depolarization clustering

**eFigure 2.** Continuous measures of spreading depolarizations

**eFigure 3.** Plasma glucose at hospital admission

**eTable.** Surgical procedures and indications

This supplementary material has been provided by the authors to give readers additional information about their work.

### eFigure 1. Definition of spreading depolarization clustering.

The working definition of a cluster was based on analysis of depolarization patterns in 181 brain trauma patients from the present study and the preceding pilot study.<sup>1</sup> A total of 3,224 spreading depolarizations (SDs) occurred in 105 of these patients. **(A)** shows a histogram of 2,673 inter-SD intervals (ISIs) recorded during uninterrupted monitoring epochs, and **(B)** shows the distribution of median ISI values observed in each patient (n=80 with  $\geq 3$  ISIs). These data suggest 60 min as a rational threshold interval to distinguish patterns of sporadic events from temporal clustering. Clusters were therefore defined as the occurrence of two consecutive ISIs with values  $\leq 60$  min (three SDs within  $\leq 120$  min). **(C)** shows the effects of varying the window duration criterion for three depolarizations on the number of patients identified as having clusters.

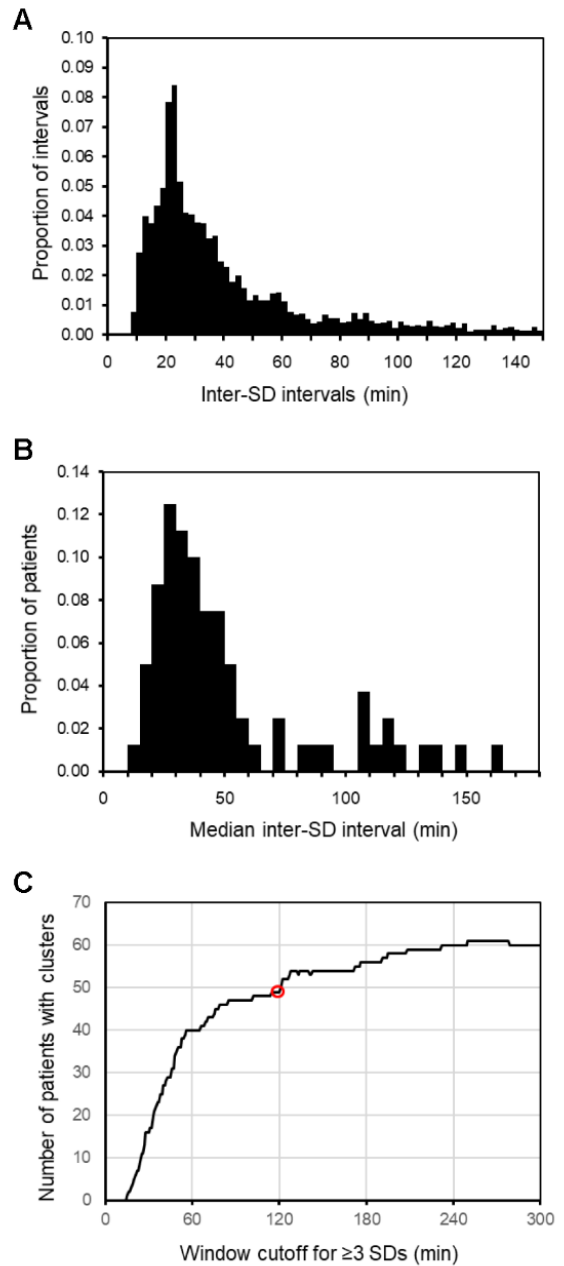

### eFigure 2. Continuous measures of spreading depolarizations.

Scatter plots show values of various continuous measures of depolarization burden for the three different patient categories (total n=83). P-values are shown for Dunn's multiple comparisons tests. Continuous measures are summarized by depolarization

category in Table 2.

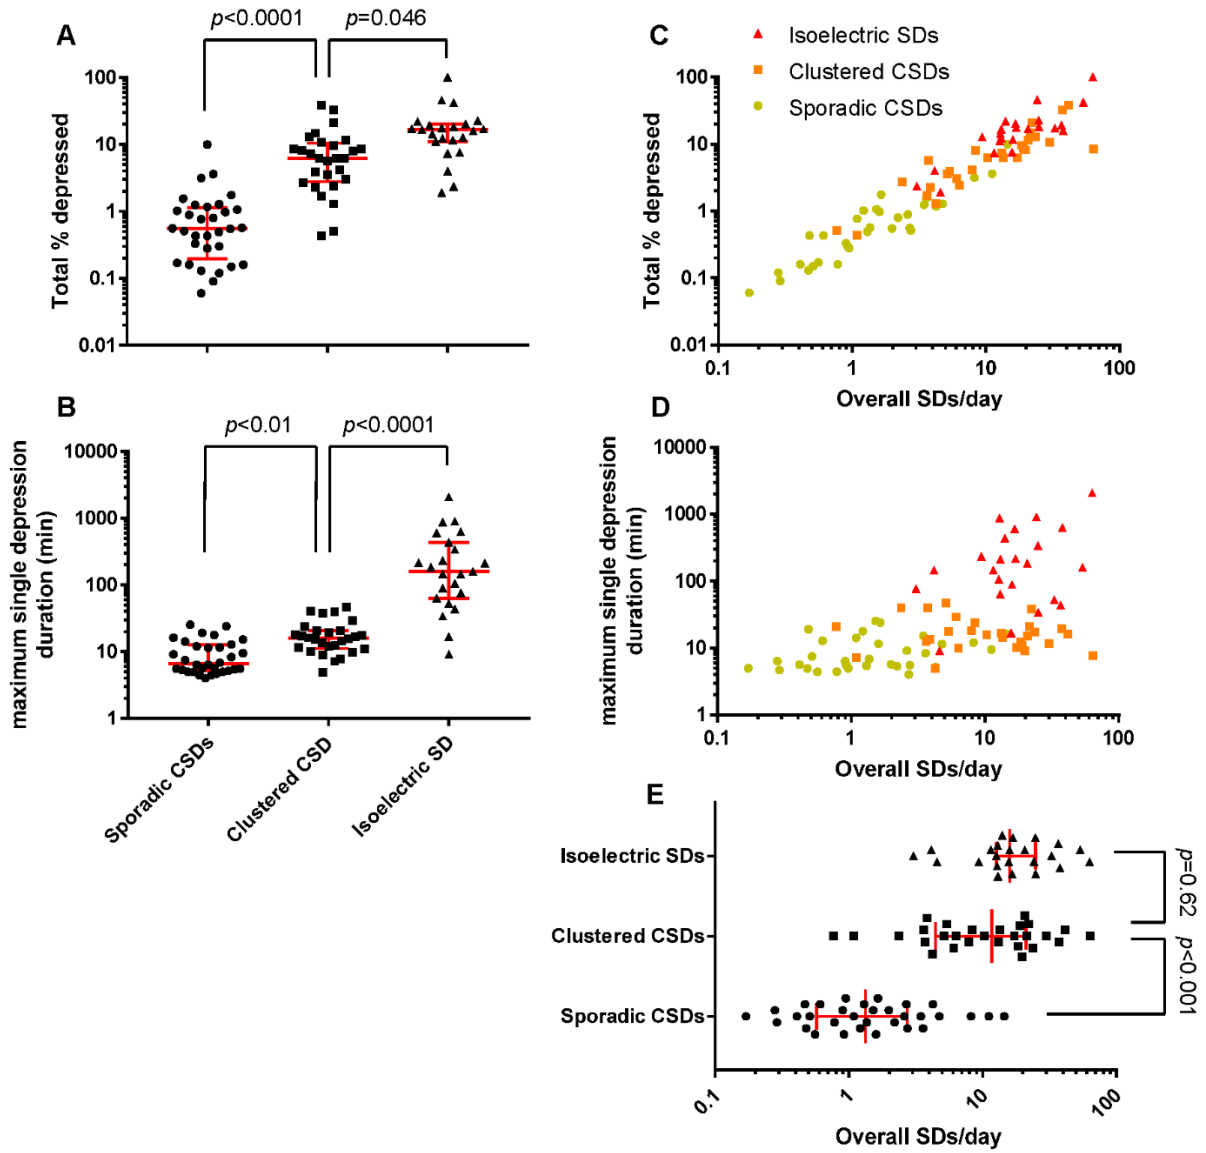

### eFigure 3. Plasma glucose at hospital admission.

(A) There was no difference in plasma glucose at hospital admission between patients with and without depolarizations (M-W,  $p=0.502$ ). However, among patients with depolarizations, plasma glucose differed by depolarization category (Kruskal-Wallis,  $p=0.017$ ). Values are shown for each patient, and bars shows medians and interquartile ranges [144 mg/dL (112,165), 151 (132,183), and 181(153,222)]. P-value reflects Dunn's multiple comparison. (B) Plasma glucose at hospital admission significantly correlated with the maximal single depression duration observed for the patient during subsequent electrocorticography (SROC,  $r=0.348$ ,  $p<0.01$ ).

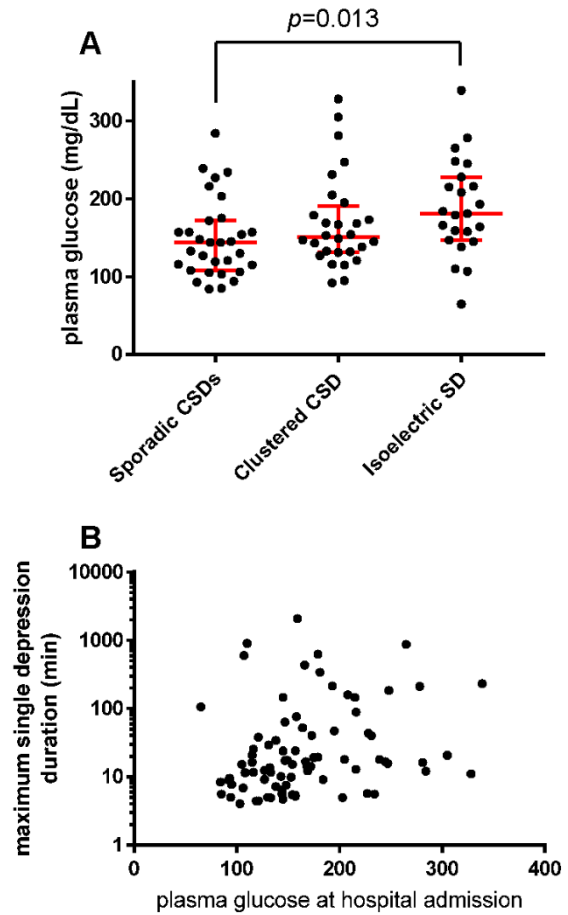

**eTable 1. Surgical procedures and indications**

|                                            |                                       | No. (%) <sup>*</sup> | Diameter, cm<br>(Median, IQR) |
|--------------------------------------------|---------------------------------------|----------------------|-------------------------------|
| <b>Cause of trauma</b>                     | Fall                                  | 58 (42)              |                               |
|                                            | MVA                                   | 19 (14)              |                               |
|                                            | Motorcycle                            | 17 (12)              |                               |
|                                            | GSW                                   | 11 (8)               |                               |
|                                            | MVA-P                                 | 10 (7)               |                               |
|                                            | Assault                               | 9 (7)                |                               |
|                                            | All-terrain vehicle                   | 4 (3)                |                               |
|                                            | Other                                 | 7 (5)                |                               |
|                                            | Unknown                               | 3 (2)                |                               |
| <b>Indications for surgery<sup>A</sup></b> | Initial CT findings                   | 94 (68)              |                               |
|                                            | Neuroworsening                        | 43 (31)              |                               |
|                                            | Expanding hematoma                    | 26 (19)              |                               |
|                                            | Refractory ICP                        | 19 (14)              |                               |
| <b>Type of surgery</b>                     | Bone flap replaced                    | 29 (21)              | 11.0, 10.0-13.8               |
|                                            | Lateralized decompressive craniectomy | 95 (69)              | 14.0, 12.0-15.0               |
|                                            | Bifrontal decompressive craniectomy   | 14 (10)              | 14.5, 11.3-19.5               |
| <b>Location</b>                            | Left                                  | 72 (52)              |                               |
|                                            | Right                                 | 51 (37)              |                               |
|                                            | Bifrontal                             | 14 (10)              |                               |
|                                            | Bilateral                             | 1 (1)                |                               |
| <b>Time to Surgery<sup>B</sup></b>         | <8 hr                                 | 103 (75)             |                               |
|                                            | 8-24 hr                               | 19 (14)              |                               |
|                                            | >24 hr                                | 16 (12)              |                               |
| <b>Procedures performed<sup>A</sup></b>    | Evacuate subdural hematoma            | 110 (80)             |                               |
|                                            | Contusion resection                   | 41 (30)              |                               |
|                                            | Lobectomy                             | 14 (10)              |                               |
|                                            | Evacuate intracerebral hematoma       | 20 (14)              |                               |
|                                            | Evacuate epidural hematoma            | 12 (9)               |                               |
|                                            | Placement of EVD                      | 22 (16)              |                               |
|                                            | Elevate depressed skull               | 9 (7)                |                               |
|                                            | Removal of foreign body               | 6 (4)                |                               |
|                                            | Anterior fossa repair for CSF leak    | 4 (3)                |                               |

<sup>\*</sup>Values represent number of patients and percentages based on 138 study patients. <sup>A</sup>More than one selection was possible for each patient. <sup>B</sup>Time of surgery after admission to study hospital. CSF = cerebrospinal fluid; CT = computed tomography; EVD = extraventricular drain; GSW = gunshot wound; ICP = intracranial pressure; MVA = Motor vehicle accident, MVA-P = pedestrian involved in motor vehicle accident.

## REFERENCES

1. Hartings JA, Bullock MR, Okonkwo DO, et al. Spreading depolarizations and outcome after traumatic brain injury: a prospective observational study. *Lancet Neurol.* 2011;10(12):1058-1064.
